# Supplementary material for: Concentrations of Tetrodotoxin (TTX) and Its Analogue 4,9-Anhydro TTX in Different Tissues of the Silver-Cheeked Pufferfish (Lagocephalus sceleratus, Gmelin, 1789) Caught in the South-Eastern Mediterranean Sea, Lebanon
Source: MDPI journal article supplement (doi:10.3390/toxins14020123), 2022-02-08
Supplement: s1 [file s1]

# Supplementary Materials: Concentrations of Tetrodotoxin (TTX) and Its Analogue 4,9-Anhydro TTX in Different Tissues of the Silver-Cheeked Pufferfish (*Lagocephalus sceleratus*, Gmelin, 1789) Caught in the South-Eastern Mediterranean Sea, Lebanon

Abed El Rahman Hassoun, Ivana Ujević, Sharif Jemaa, Romana Roje-Busatto, Céline Mahfouz, Milad Fakhri and Nikša Nazlić

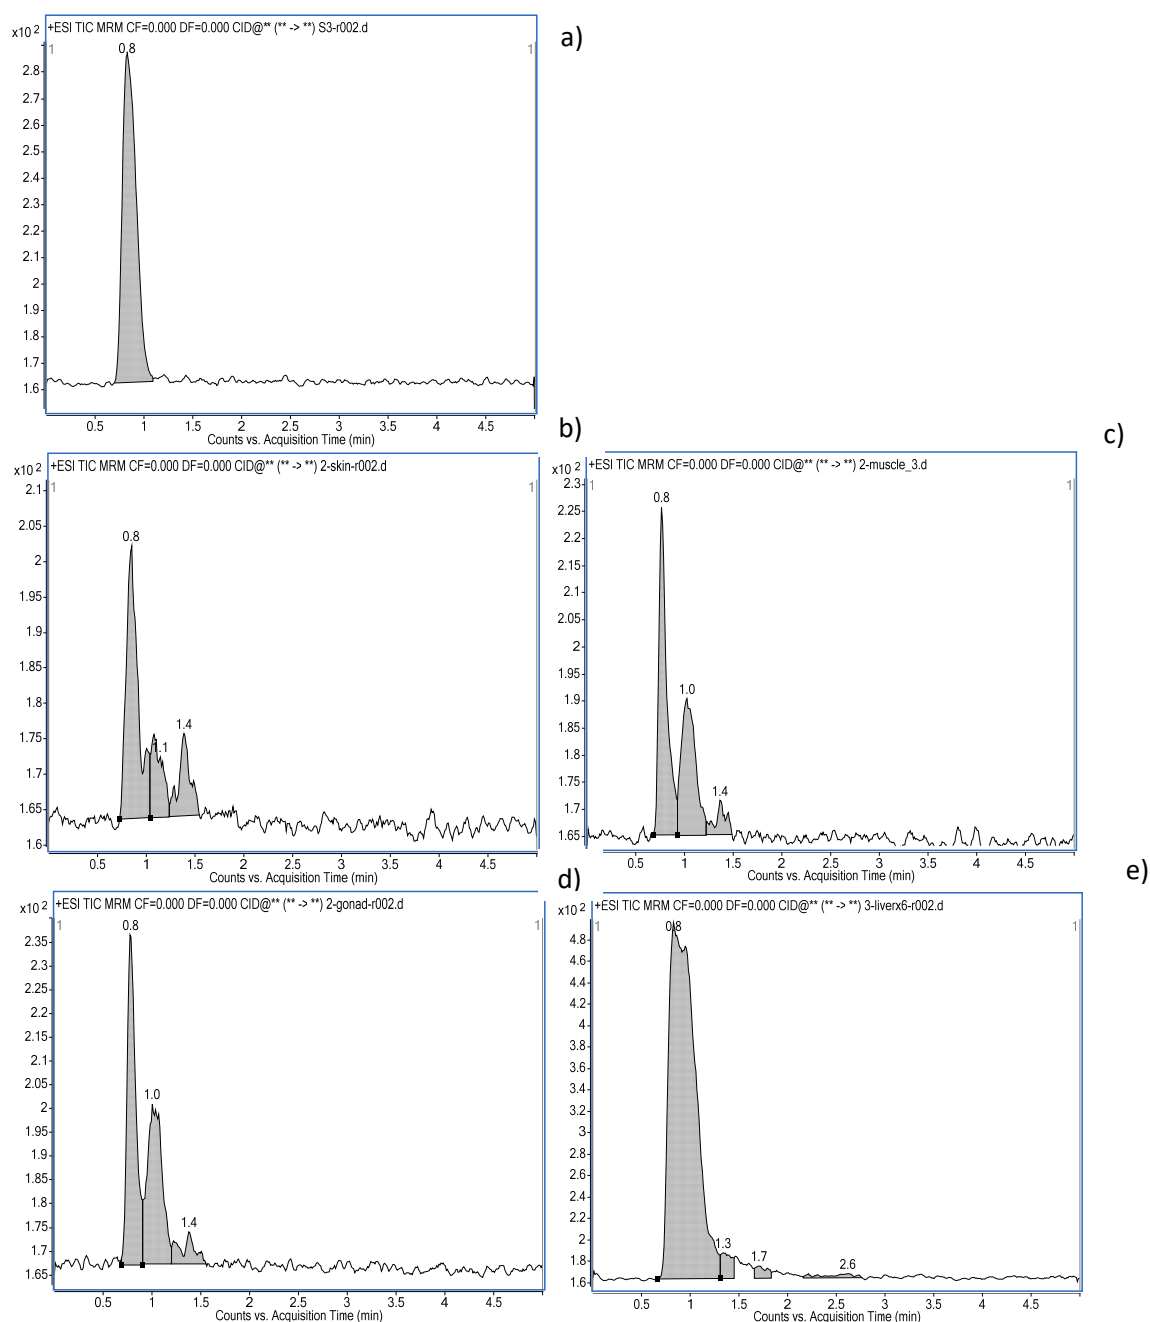

**Figure S1.** Total ion current plots of LC-MS/MS derived by the multiple reaction monitoring (MRM) of (a) TTX standard calibration solution (Retention Time = 0.8 min) and *Lagocephalus sceleratus* tissue extracts of: (b) skin, (c) muscle, (d) liver and (e) gonad, sampled at the South-Eastern Mediterranean Sea, Lebanon.

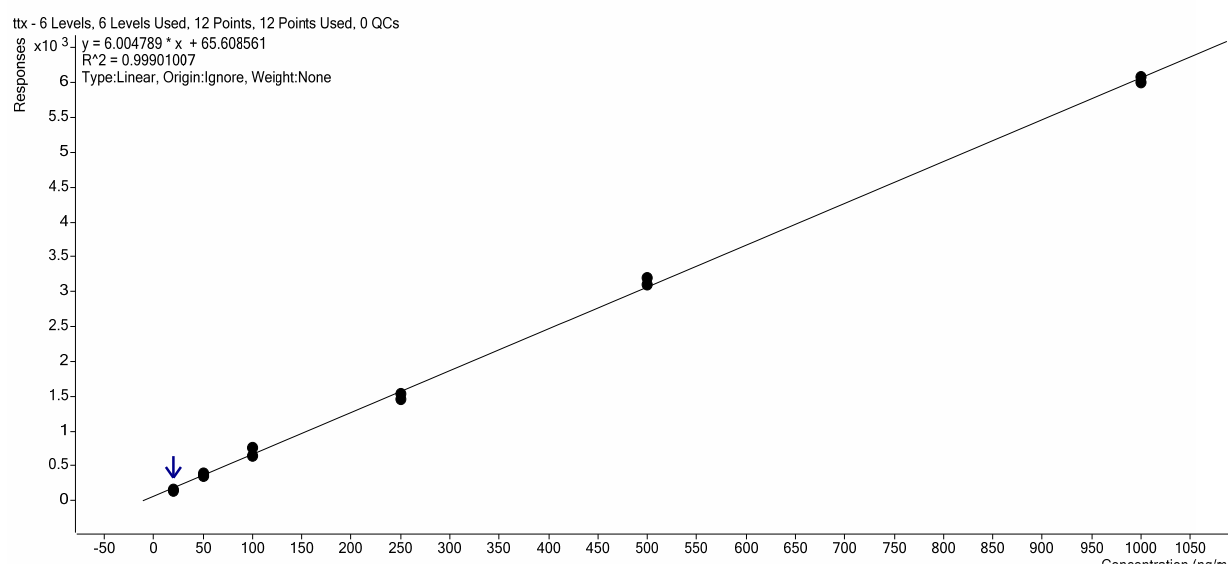

**Figure S2.** Response of the instrument and concentrations of standard solutions are linear,  $r^2 > 0.99$ , as shown for TTX.

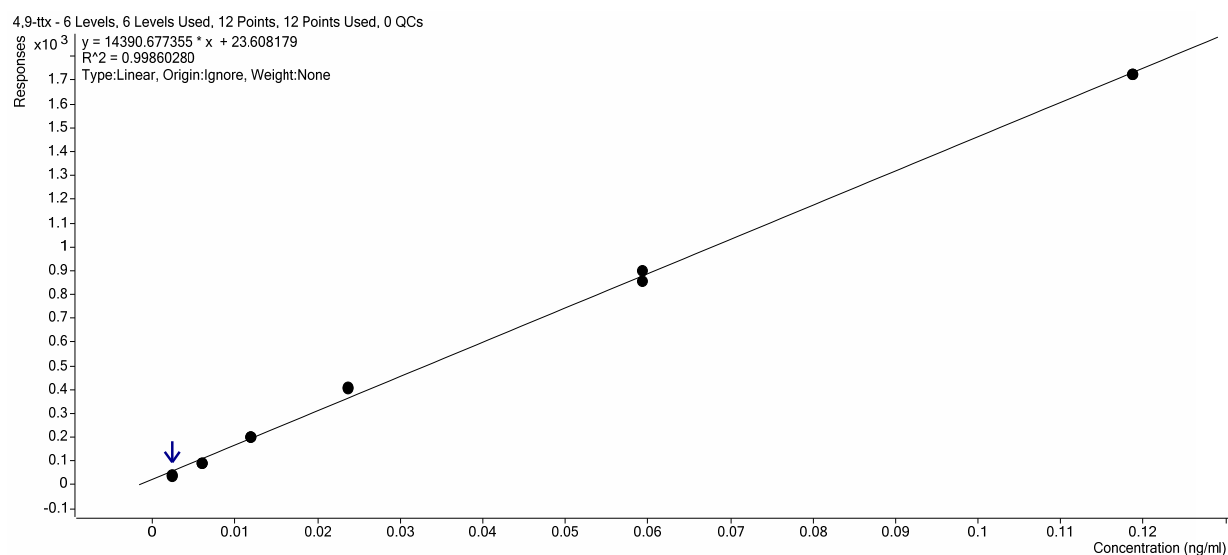

**Figure S3.** Response of the instrument and concentrations of standard solutions are linear,  $r^2 > 0.99$ , as shown for 4,9-anhydro TTX.
